# Supplementary material
Source: MDPI journal article supplement (https://www.mdpi.com/2673-3501/2/3/19)
Supplement: s1 [file s1]

## Supporting information

### **Importance of Doping Sequence in Multiple Heteroatom-Doped Reduced Graphene Oxide as Efficient Oxygen Reduction Reaction Electrocatalysts**

Jin Hee Kim<sup>1</sup>, Jong Hun Han<sup>1,2</sup>, Jae-Hyung Wee<sup>3</sup>, Go Bong Choi<sup>3</sup>, Seungki Hong<sup>3,4</sup>, Yoong Ahm Kim<sup>3,\*</sup>

<sup>1</sup> Optoelectronics Convergence Research Center and School of Chemical Engineering, Chonnam National University, 77 Yongbong-ro, Buk-gu, Gwangju 61186, Republic of Korea.

<sup>2</sup> School of Chemical Engineering, Chonnam National University, 77 Yongbong-ro, Buk-gu, Gwangju 61186, Republic of Korea.

<sup>3</sup> Department of Polymer Engineering, Graduate School, School of Polymer Science and Engineering & Alan G. MacDiarmid Energy Research Institute, Chonnam National University, 77 Yongbong-ro, Buk-gu, Gwangju 61186, Republic of Korea.

<sup>4</sup> Carbon Composite Material Research Center, Korea Institute of Science and Technology (KIST), Jeonbuk 55324, Republic of Korea.

\*E-mail: yak@chonnam.ac.kr

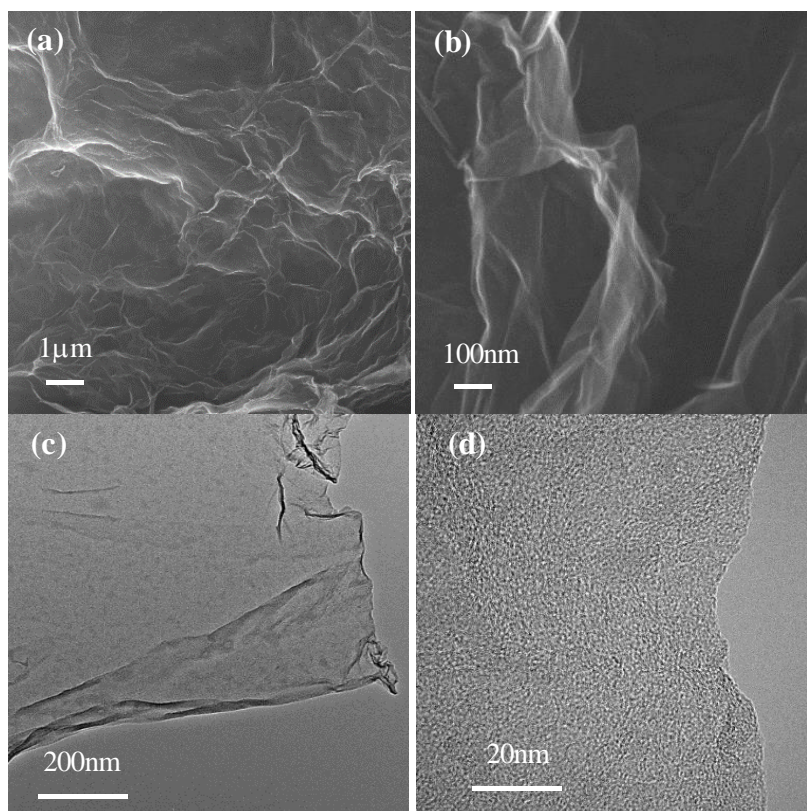

**Figure S1.** SEM (a, b) and TEM (c, d) images of N, P codoped reduced graphene oxide at different magnification. Note that sheet-like graphenes are corrugated and wrinkled. Note that dual doped reduced graphene oxide was obtained by thermally treating the GO and DNA mixture at 800°C in argon.

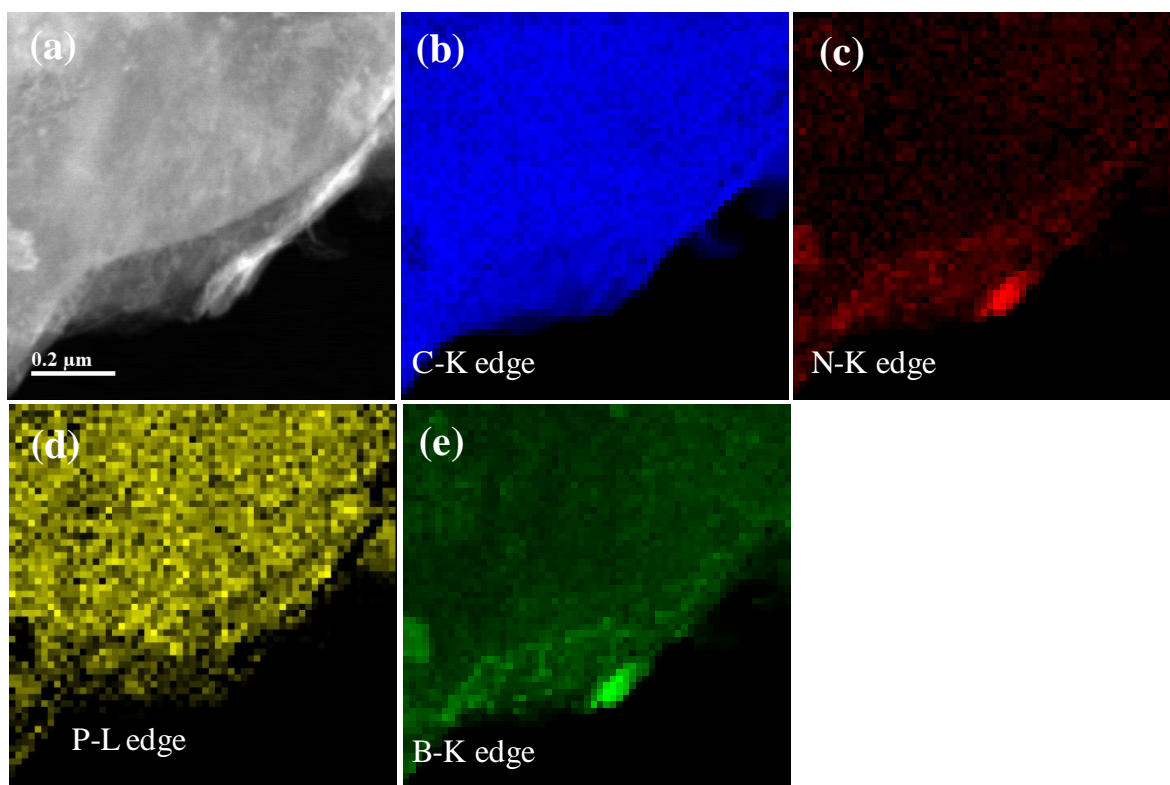

**Figure S2.** TEM image and EELS elemental mapping images of ternary doped reduced graphene oxide obtained using one-step method: (a) elastic TEM image and (b) carbon, (c) nitrogen, (d) phosphorus and (e) boron atoms. Note that the introduced heteroatoms are homogeneously distributed within graphene matrix.

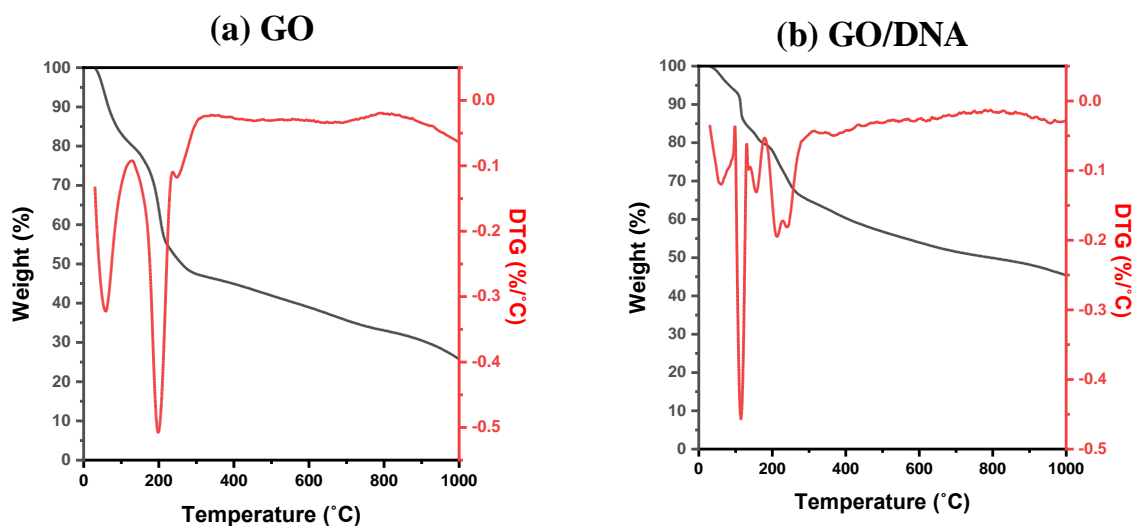

**Figure S3.** Thermogravimetric curves of (a) graphene oxide and (b) graphene oxide and DNA mixture in argon atmosphere and their derivatives.

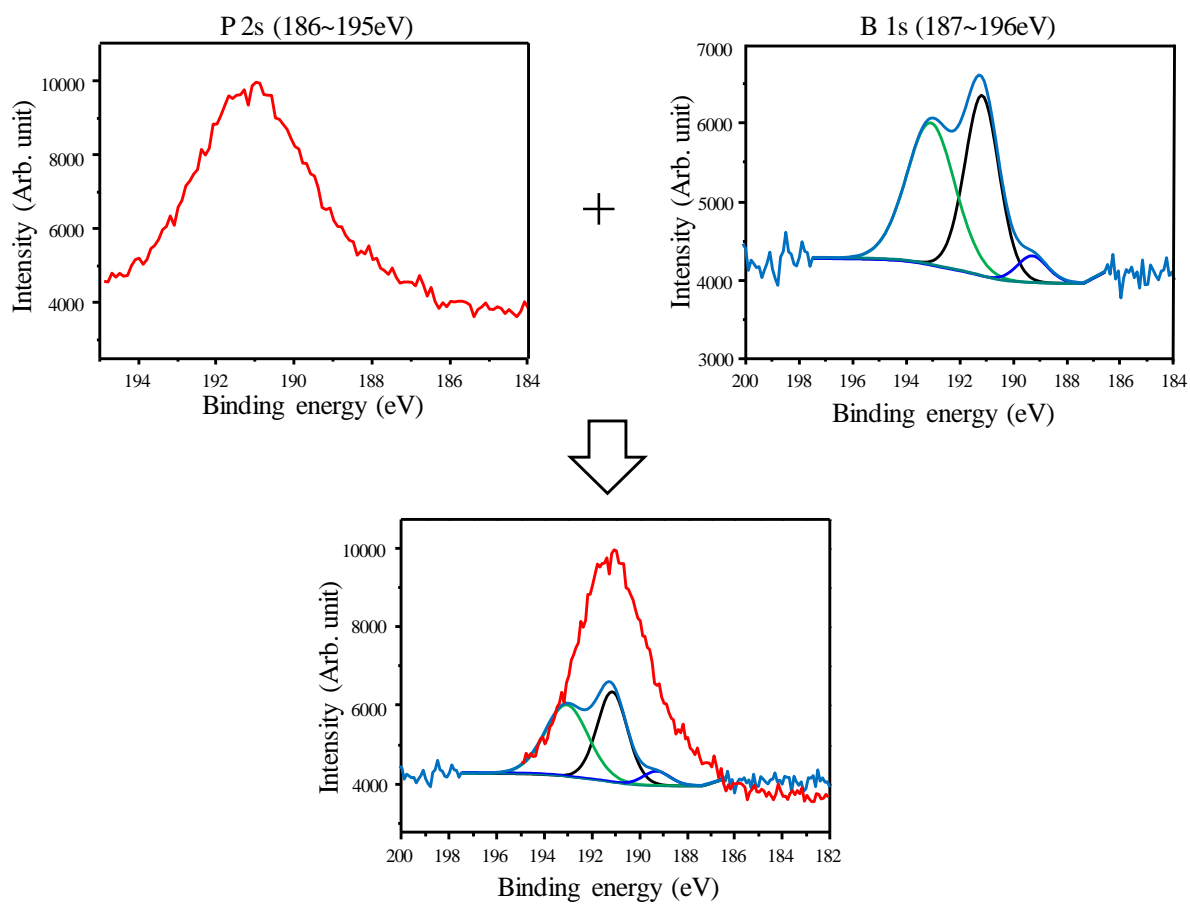

**Figure S4.** P 2s and B 1s spectra of ternary doped reduced graphene oxide using two-step.

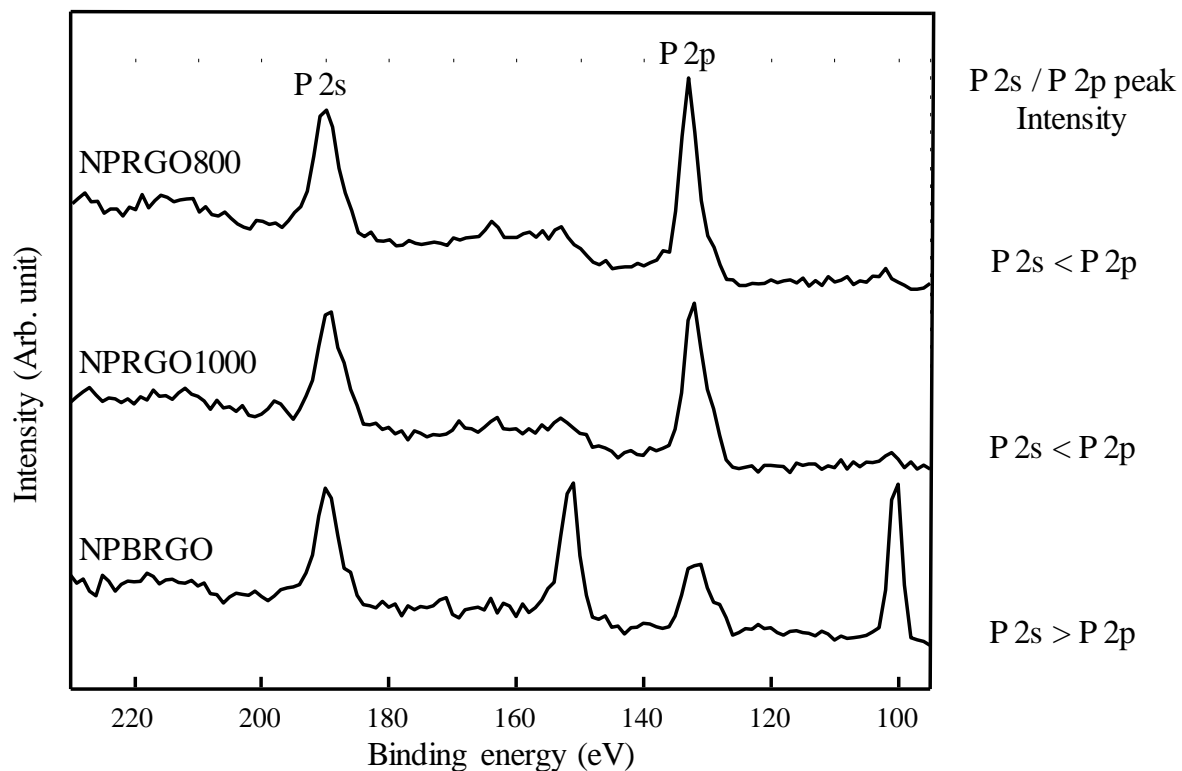

**Figure S5.** Comparative XPS spectra of N, P dual doped RGO that are prepared at different temperatures and ternary doped RGO. Note the relative intensity of P 2s and P 2p.

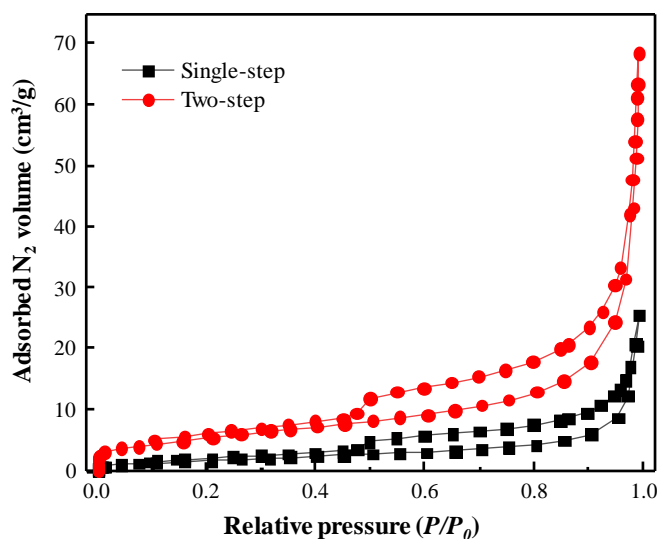

**Figure S6.** Nitrogen adsorption/desorption isotherms of ternary doped RGOs obtained using single-step and two-step methods.

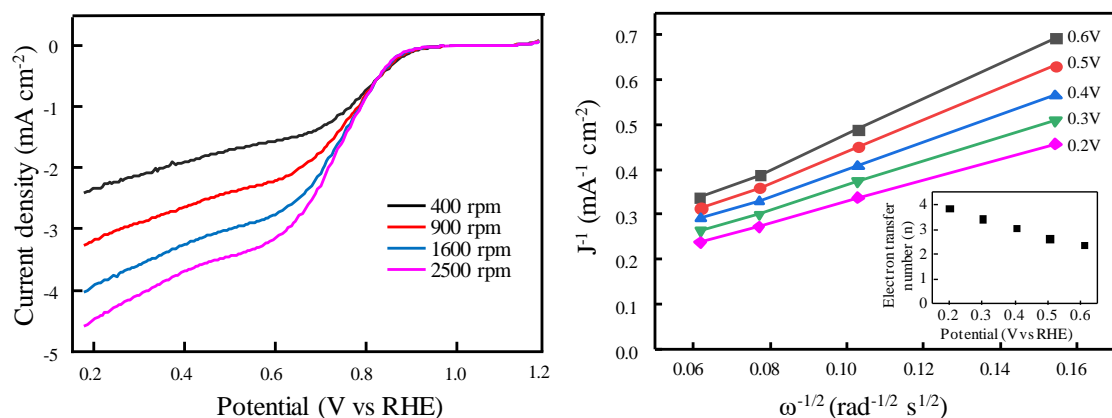

**Figure S7.** Linear sweep voltammograms of boron doped RGO obtained in 0.1 M O<sub>2</sub>-saturated KOH electrolyte using different rotation speeds and their K-L plots in the range from 0.2 to 0.6 V (inset is the electron transfer number at different potential).

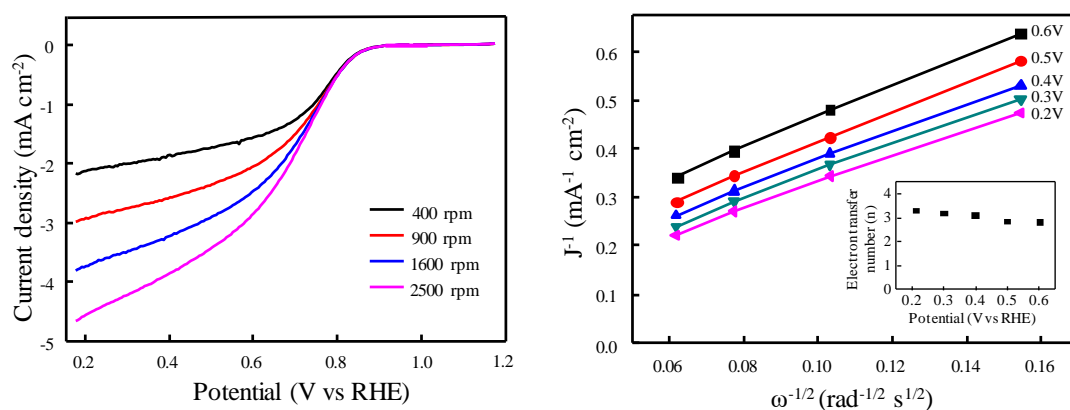

**Figure S8.** Linear sweep voltammograms of N, P codoped RGO obtained in 0.1 M O<sub>2</sub>-saturated KOH electrolyte using different rotation speeds and their K-L plots in the range from 0.2 to 0.6 V (inset is the electron transfer number at different potential).

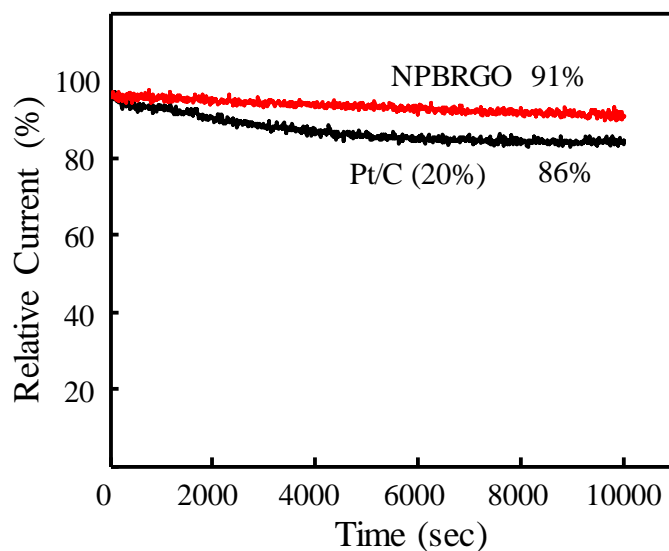

**Figure S9.** Chronoamperometric responses in O<sub>2</sub>-saturated 0.1M KOH solution for two-step synthesized ternary RGOs and 20% Pt/C electrocatalysts at 0.7V vs. RHE with a rotation rate of 1600rpm.

**Table S1** Relative amount of bonding configurations of three heteroatoms for ternary doped reduced graphene oxides obtained using single-step and two-step methods.

| I.D.        | Total B<br>(atomic %) | Boron configuration (atomic %) |                   |                  |
|-------------|-----------------------|--------------------------------|-------------------|------------------|
|             |                       | B <sub>2</sub> O <sub>3</sub>  | BC <sub>2</sub> O | BCO <sub>2</sub> |
| Single-step | 8.44                  | 1.69                           | 6.10              | 0.65             |
| Two-step    | 3.90                  | 1.27                           | 1.90              | 0.74             |

  

| I.D.        | Total N<br>(atomic %) | Nitrogen configuration (atomic %) |          |            |      |
|-------------|-----------------------|-----------------------------------|----------|------------|------|
|             |                       | Pyridinic                         | Pyrrolic | Quaternary | N-Ox |
| Single-step | 6.85                  | 4.68                              | 1.79     | 0.38       | -    |
| Two-step    | 3.02                  | 0.94                              | 1.02     | 0.90       | 0.14 |

  

| I.D.        | Total P<br>(atomic %) | Phosphorus configuration (atomic %) |      |      |
|-------------|-----------------------|-------------------------------------|------|------|
|             |                       | P-O                                 | P-N  | P-C  |
| Single-step | 1.01                  | 0.27                                | 0.42 | 0.32 |

|          |      |      |      |      |
|----------|------|------|------|------|
| Two-step | 2.36 | 0.10 | 0.70 | 1.56 |
|----------|------|------|------|------|

**Table S2** Raman parameter of ternary doped reduced graphene oxides obtained using one-step and two-step methods.

| I.D.     | $W_D$ (cm <sup>-1</sup> ) <sup>a)</sup> | $W_G$ (cm <sup>-1</sup> ) <sup>b)</sup> | $I_D/I_G$ <sup>c)</sup> | $I_D/(I_D + I_G)$ |
|----------|-----------------------------------------|-----------------------------------------|-------------------------|-------------------|
| One-step | 88.4                                    | 73.2                                    | 0.95                    | 0.49              |
| Two-step | 76.3                                    | 68.9                                    | 1.36                    | 0.58              |

a)  $W_D$  is the full width at half maxim of the D band, b)  $W_G$  is the full width at half maxim of the G band, and c)  $I_D/I_G$  is the integrated intensity of the D band divided by the integrated intensity of the G band.

**Table S3** Atomic composition of dual- and ternary-doped reduced graphene oxides.

| I.D.   | Atomic % |       |      |      |      |
|--------|----------|-------|------|------|------|
|        | C        | O     | N    | P    | B    |
| NPRGO  | 79.69    | 11.34 | 5.11 | 3.86 | -    |
| NPBRGO | 77.50    | 13.23 | 3.02 | 2.36 | 3.90 |
